RESEARCH ARTICLE

# Social determinants of adult mortality from non-communicable diseases in northern Ethiopia, 2009-2015: Evidence from health and demographic surveillance site

Semaw Ferede Abera<sup>1,2,3,4\*</sup>, Alemseged Aregay Gebru<sup>3,4</sup>, Hans Konrad Biesalski<sup>1,2</sup>, Gebisa Ejeta<sup>5</sup>, Andreas Wienke<sup>6</sup>, Veronika Scherbaum<sup>1,2</sup>, Eva Johanna Kantelhardt<sup>6,7</sup>

**1** Institute of Biological Chemistry and Nutrition, University of Hohenheim, Stuttgart, Germany, **2** Food Security Center, University of Hohenheim, Stuttgart, Germany, **3** School of Public Health, College of Health Sciences, Mekelle University, Mekelle, Ethiopia, **4** Kille Awlaelo- Health and Demographic Surveillance Site, Mekelle, Ethiopia, **5** Department of Agronomy, Purdue University, West Lafayette, Indiana, United States of America, **6** Institute of Medical Epidemiology, Biostatistics, and Informatics, Faculty of Medicine, Martin-Luther University, Halle, Germany, **7** Department of Gynaecology, Faculty of Medicine, Martin-Luther University, Halle, Germany

\* [semawfer@yahoo.com](mailto:semawfer@yahoo.com)

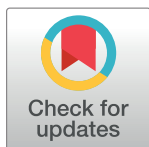

**OPEN ACCESS**

**Citation:** Abera SF, Gebru AA, Biesalski HK, Ejeta G, Wienke A, Scherbaum V, et al. (2017) Social determinants of adult mortality from non-communicable diseases in northern Ethiopia, 2009-2015: Evidence from health and demographic surveillance site. *PLoS ONE* 12(12): e0188968. <https://doi.org/10.1371/journal.pone.0188968>

**Editor:** Hajo Zeeb, Leibniz Institute for Prevention Research and Epidemiology BIPS, GERMANY

**Received:** January 16, 2017

**Accepted:** November 16, 2017

**Published:** December 13, 2017

**Copyright:** This is an open access article, free of all copyright, and may be freely reproduced, distributed, transmitted, modified, built upon, or otherwise used by anyone for any lawful purpose. The work is made available under the [Creative Commons CC0](https://creativecommons.org/licenses/by/4.0/) public domain dedication.

**Data Availability Statement:** The dataset of this study was extracted from an ongoing surveillance research named Kille Awlaelo-Health and Demographic Surveillance Site (KA-HDSS) where the principal investigator is a research member of the study. The dataset underlying this research, which also contains detailed sensitive information such as the household location (as measured by GPS) of deceased individuals and their causes of death, is exclusively a property of KA-HDSS. In

## Abstract

### Introduction

In developing countries, mortality and disability from non-communicable diseases (NCDs) is rising considerably. The effect of social determinants of NCDs-attributed mortality, from the context of developing countries, is poorly understood. This study examines the burden and socio-economic determinants of adult mortality attributed to NCDs in eastern Tigray, Ethiopia.

### Methods

We followed 45,982 adults implementing a community based dynamic cohort design recording mortality events from September 2009 to April 2015. A physician review based Verbal autopsy was used to identify the most probable causes of death. Multivariable Cox proportional hazards regression was performed to identify social determinants of NCD mortality.

### Results

Across the 193,758.7 person-years, we recorded 1,091 adult deaths. Compared to communicable diseases, NCDs accounted for a slightly higher proportion of adult deaths; 33% vs 34.5% respectively. The incidence density rate (IDR) of NCD attributed mortality was 194.1 deaths (IDR = 194.1; 95% CI = 175.4, 214.7) per 100,000 person-years. One hundred fifty-seven (41.8%), 68 (18.1%) and 34 (9%) of the 376 NCD deaths were due to cardiovascular disease, cancer and renal failure, respectively. In the multivariable analysis, age per 5-year increase (HR = 1.35; 95% CI: 1.30, 1.41), and extended family and non-family household members (HR = 2.86; 95% CI: 2.05, 3.98) compared to household heads were associated

addition to the sensitive nature of the data, sharing this dataset publicly can deter other ongoing researches run by the research site. Due to these conditions, the dataset will not be shared publicly. However, all interested researchers can access to the underlying data by sending an e-mail request to the data holder, Semaw Ferede Abera, through [semawfer@yahoo.com](mailto:semawfer@yahoo.com).

**Funding:** The Centers for Disease Control and Prevention (CDC), through Ethiopian Public Health Association (EPHA) in accordance with the EPHA-CDC Cooperative Agreement No.5U22/PS022179\_05, and Mekelle University funded Kilte Awlaleo-Health and Demographic Surveillance Site (KA-HDSS), a research project where the corresponding author works as co-investigator and extracted the data for the current research. The authors are also thankful to DAAD through the Food Security Center (FSC) at the University of Hohenheim for the scholarship opportunity given to the first author, Semaw Ferede Abera, in his PhD study. The funders had no role in study design, data collection and analysis, decision to publish, or preparation of the manuscript.

**Competing interests:** The authors have declared that no competing interests exist.

with a significantly increased hazard of NCD mortality. Although the difference was not statistically significant, compared to poor adults, those who were wealthy had a 15% (HR = 0.85; 95% CI: 0.65, 1.11) lower hazard of mortality from NCDs. On the other hand, literate adults (HR = 0.35; 95% CI: 0.13, 0.9) had a significantly decreased hazard of NCD attributed mortality compared to those adults who were unable to read and write. The effect of literacy was modified by age and its effect reduced by 18% for every 5-year increase of age among literate adults.

## Conclusion

In summary, the study indicates that double mortality burden from both NCDs and communicable diseases was evident in northern rural Ethiopia. Public health intervention measures that prioritise disadvantaged NCD patients such as those who are unable to read and write, the elders, the extended family and non-family household co-residents could significantly reduce NCD mortality among the adult population.

## Introduction

Non-communicable diseases (NCDs) are medical conditions or diseases that are, by definition, non-infectious and non-transmissible between people [1]. Major NCDs include cardiovascular diseases, cancer, chronic respiratory diseases, diabetes, rheumatologic diseases and mental disorders, which contribute to about 80% of all NCD-attributed deaths [1–4].

Studies have demonstrated that the burden and sequelae of NCDs are increasing considerably worldwide [5–10], and that NCDs constitute a quadruple burden in developing countries in addition to communicable, neonato-maternal and nutritional diseases, injuries and road traffic accidents [11–13]. NCDs account for the largest share of mortality globally [14, 15], and 82.4% of the total deaths occur in low and middle income countries [15].

In recent years, global attention and the commitment to address NCDs has grown rapidly. Sustainable Development Goal 3 (SDG 3) target 3.4 [16] of the WHO states “By 2030, reduce by one third premature mortality from NCDs through prevention and treatment and promote mental health and well-being” to ensure that global development is sustainable [17–19]. If health policies are not shaped by reliable evidence for the purpose of optimizing disease interventions, the achievement of this target will likely be an ambition particularly in low and middle income countries (LMICs) due to the fact that health sectors in LMICs are also strained by the existence of other resource-intensive competing priorities [13]. In 2012, a study conducted by Weldearegawi et al. in northern Ethiopia, from the same study area, indicated that NCDs accounted for 28.6% of the total deaths [20]. However, the aim of the study was merely descriptive and did not attempt to inferentially identify the factors associated with NCD-attributed mortality.

Health or illness status of individuals are determined by social structures through micro level processes, and the quality of these social structures are in turn shaped by macro level processes like the political ideology of governments [21]. Nowadays, effective reduction in population and individual level health inequality should be viewed from the philosophical and holistic perspective of integrating interventions that could address social and economic inequalities between and within population [21–25].

According to the World Health Organization (WHO)'s Commission on Social Determinants of Health analytical framework for priority public health conditions, social and economic factors have a vital public health importance. These factors influence exposure to several downstream factors, vulnerability to disease development, utilization of health care services, health outcomes and consequences [26].

Several studies have consistently showed that attaining higher education is observed as the strongest indicator of social determinant of good health [27–30]. Low educational attainment was reported to predict increased risk for and mortality from NCDs [31–38], low longevity [39, 40], and poor health service utilization [40, 41]. The consistently strong association of education with the risk of developing NCDs and dying from NCDs, even after controlling the effect of lifestyle factors, may indicate its causal relationship [28, 31, 33]. In one large cohort study, having a less educated partner was associated with higher risk of mortality [42]. On the other hand, studies have shown that unemployed individuals had higher NCD risk factor profile [43], differential odds of developing and dying from some NCDs and all-cause mortality [44–46], and these effects remained persistent after adjusting for the use of preventive medications, clinical and lifestyle factors. In addition, employment insecurity was also associated with a decrease in preventive health service utilization [47].

The relationship of income inequality and poor health was extensively studied [48, 49]. Higher risks of morbidity and mortality from NCDs were also associated with income status [50–53]. However, the adverse effect of income inequality on health becomes more pronounced if the inequality exists at national level than in small areas [54]. In the literature, three main hypotheses (social capital, status anxiety and neo-materialist hypotheses) are widely mentioned to explain the mechanisms income inequality follows to result in poor health [21, 49]. Some other studies, however, showed that wealth status may not be an important factor in relation to mortality for some NCDs like acute myocardial infarction [55]. Several research works have also established that household composition and structure, marital status, age and ethnicity could be germane factors in epidemiological investigations focusing on mortality [7, 32, 40, 56–60]. In general, the mechanisms of the socio-economic and demographic determinants of NCD attributed mortality are shown in the conceptual framework customized from the WHO's Commission on Social Determinants of Health analytical framework for priority public health conditions [26], as described in the supplementary document (S1 Fig).

Evidence on social determinants of NCD attributed mortality is essential for evidence based public health actions against NCDs. Despite such importance, to the best of our knowledge, there has been no detailed systematic quantification of the effect of such factors on the risk of mortality from NCDs using population-based prospective data in Ethiopia. Consequently, our understanding of how socio-demographic and economic determinants drive NCD-attributed mortality is very limited.

Bearing these factors in mind, the present paper presents the adult mortality burden due to NCDs and its socio-demographic and economic determinants in northern Ethiopia using population-based data from Kille Awlaelo-Health and Demographic Surveillance Site (KA-HDSS). A description of the broad and specific causes of death by the study population's characteristics is also provided.

## Methods

### Study setting

Complete civil registration and vital statistics (CRVS) systems provide essential information for public health policy and prevention [61, 62]. Nevertheless, complete CVRS is absent in sub-Saharan Africa including Ethiopia. In countries where CVRS is absent, an alternative

effective way of generating reliable and accurate vital events data, although not fully representative, could be made through health and demographic surveillance systems (HDSS)[62]. HDSS collect data on vital events, causes of death, and socio-economic data based on a geographically defined population ranging from tens of thousands to around a quarter of million [63]. Such longitudinal research systems have been implemented in Africa, Asia and Oceania and have been jointly organized by a cross-continental organization called The International Network of field sites with continuous Demographic Evaluation of Populations and Their Health in developing countries (INDEPTH Network) [63]. Under this research network, there are over 3.8 million surveillance population, and KA-HDSS is one of the contributing member sites of this organization [64].

Our current study used data from KA-HDSS, which is located 835 kilometres (KMs) north of Addis Ababa, the capital city of Ethiopia. KA-HDSS was established in 2009 home-based under the School of Public Health in Mekelle University. It is led by the university's Research and Community Services Directorate and College of Health Sciences with the central research motivation of generating population-based health and demographic-related longitudinal information to support evidence-based decision making. It started its surveillance by enumerating and recording data from 66,438 individuals who were living in 14,453 households. These households were located in 10 kebelles, and only one of the 10 kebelles is urban. According to the Ethiopian government administrative structure, kebelles are the smallest administrative units with an average population of 5,000–6,000.

KA-HDSS collects data on vital events (birth, death, and migration in and out), pregnancy outcome, causes of death and marital status, which change on a continuous basis. Moreover, update data are collected biannually from the entire population and accordingly the surveillance database is updated twice a year. The data collectors are fulltime workers, from among the community, who are intensively trained on the different data collection tools, skills and preparations for interviewing by the research team academics. In addition, refresher training of a similar content is delivered to the data collectors twice a year before the start of each update. Generally, the study area is characterised by low fertility and mortality [20, 60] and high external outmigration of adults to the Arab world.

## Verbal autopsy data

Information on mortality and its causes is critical to public health planning and action. Such public health information is non-existent in developing countries where complete vital registration is not available and most deaths occur at home [65]. Collecting cause-specific mortality information using the verbal autopsy (VA) method is the most feasible, comprehensive and appropriate approach to narrow mortality information gaps in resource-limited settings [66–68]. VA is a research tool used to assign probable causes of death by interviewing a close caregiver about the signs and symptoms of the deceased's terminal illness [68].

In KA-HDSS, mortality data are collected from the closest adult care givers who took care of the deceased individuals, within 45–55 days after each death event, considering the mourning period of the community, by trained high school completed residents. The surveillance research project collects VA data using standard VA questionnaires for neonates, post-neonates and children and adults [69]. The current study used the VA data set for adults, whose age was greater than 15 years at the time of death, collected from September 2009 to April 2015.

We applied the physician review method to identify the most probable cause of death. The reviewing physicians are trained for the use of International Classification of Diseases (ICD-10) [69]. The collected questionnaire-based VA data were submitted to two blinded physicians

for their independent review to assign the probable cause of death. If the two physicians concluded a specific cause of death, say tuberculosis (TB), then the cause of death was considered to be TB. If the two blinded physicians assigned two different causes of death, then a third blinded physician was invited to review and assign a cause of death which served as a tie breaker. If the third physician assigned a cause of death different from assigned causes by either of the first two physicians, the cause of death was classified as “indeterminate”.

In this study, premature mortality from NCDs was defined as the relative proportion of NCD death in the 15–64 age group. The cut-off of age 65 years was used in accordance with the estimated life expectancy for Ethiopia [15]. A similar definition was also used by Streatfield et al. [58]. Moreover, in each household, one person was defined as the head of a given household. In the context of the study area, the husband is usually the head of the household. If the husband is dead, then the husband’s wife, the mother, is usually the head of the household. The relationship of household members to the household head can be either close or extended family members or non-family member. Geographic locations of households, derived from the altitudinal measurements obtained using GPS, were classified as located in midland or highland.

The WHO defines social determinants of health as “The conditions in which people are born, grow, work, live, and age, and the wider set of forces and systems shaping the conditions of daily life. These forces and systems include economic policies and systems, development agendas, social norms, social policies and political systems” [70]. In this study, social determinants such as education, occupation, marital status, residence, geographic location, wealth index, intra-household relationships, household headship, sex of household head, health seeking practice during terminal illness were considered. The effects of demographic factors (age and sex) were also examined in the analysis. Data on these variables were collected using KA-HDSS data collection tools.

## Data management and statistical analysis

The dataset was cleaned and checked for the plausibility of the data values. Principal component analysis (PCA) was used to generate wealth index variable reproducing the principles and methods of Demographic and Health Survey (DHS) [71]. The wealth index variable was constructed from the attributes of goods and resources owned by the households (for instance, ownership of radio/tape), construction material and characteristics of the houses (types of floor, roof and wall), and access to resources and services (like access to electricity, land ownership, size of land owned as measured in hectare, drinking water sources, toilet availability, functionality and type). Indicator variables, coded as 0 for “No” or 1 for “Yes”, were computed from each category of the included categorical variables before PCA was applied. However, the dummied variables that showed no variation were excluded from the analysis. Socio-economic data were not collected for the households which were established after the start of the surveillance because such data should be collected at baseline and every 5 year from the baseline. Consequently, the wealth status of the adult cohort members (18.9%) who lived in those households was unknown. The main outcome was time to death from NCDs and the incidence density was calculated by dividing the number of new NCD attributed mortality events by the person-years of all observations that were at risk of dying from NCDs. Causes of death were classified using the international disease classification system [69]. Accordingly, NCD related mortality includes all adult deaths caused by neoplasms, nutritional and endocrine disorders, diseases of the circulatory system, respiratory disorders, gastrointestinal disorders, renal disorders, mental and nervous system disorders which have VA codes of VA-02, VA-03, VA-04, VA-05, VA-06, VA-07, and VA-08, respectively. Additionally, VA-01 and VA-11 were classified

as communicable diseases and external causes of death, respectively. All deaths which had the code VA-09 were classified as pregnancy-, childbirth- and puerperium-related deaths.

The starting point of the surveillance project was 11 September 2009. Entry of new members into the surveillance project was possible by enumeration, external immigration or birth. Corresponding dates for these initiating events were accurately recorded. Moreover, the end point of this study was 26 April 2015. Exit of residents from the surveillance project was possible by outmigration and death. Entries of new members into the cohort population or exits of existing members could happen at any time. So, epidemiologically, this study followed a community based dynamic cohort study design. In such design contexts, the length of the follow-up time contributed by each adult could not be the same due to different enrolment time, censoring or competing interests [72], but the time contribution by each cohort member, measured per person-unit time, should be taken into consideration and must be accurately quantified. The 376 NCD-attributed deaths, of the total 45,982 cohort members, were events of our interest whereas outmigration and mortality from non-NCD causes were treated as censored cases. The exact dates for these censored events were also recorded. Moreover, all of the observed cases that were alive by 26 April 2015 were also considered as administratively censored cases. More than a quarter, 28.7%, of the adults were externally out-migrated, and these adult residents were loss to follow-up cases.

Cox's proportional hazards regression model was used to analyse the survival-type data that include censored observations [72, 73]. A Log rank test was used to assess the equality of the survival patterns. The incidence density rates of NCD-attributed mortality and 95% confidence intervals were calculated. A key assumption of the Cox proportional hazards regression model is the proportional hazards assumption which claims that the effect of a given a covariate, quantified in hazard ratio, does not change over time [73–75]. Adherence to this assumption was checked using the plots of scaled and smoothed Schoenfeld residuals with the reference value of zero slope along the survival time [74,75]. Hence, each fitted covariate had a plot approximately parallel to the reference line, a line that depicted a zero slope with no significant departure, proving that the proportional hazards assumption of the model is fulfilled. In order to build a more pragmatic model with improved inference, interaction effects were also checked by forming a set of biologically plausible interaction terms from the main effects in the model. The significance of each separate interaction was assessed by adding each interaction term to the main effects model and using the partial likelihood ratio test [73]. Assessment of the problem of multicollinearity was checked at variance inflation factor (VIF) of greater than 10 and multicollinear variables were dropped from fitting into the model [76].

All of the variables with a p-value less than 0.25 in the univariate analysis were eligible for inclusion into the multivariable Cox proportional hazards regression [73]. Adjusted hazards ratio (HR) was used to estimate the degree of independent effect of each fitted predictor on the time to NCD attributed death. We also performed a sensitivity analysis to assess the impact of lost to follow-up on our estimates and generally, we found no difference in the results (S1 Table). All the analyses were performed in stata 13.0.

## Ethical statement

The Ethiopian Science and Technology Agency has ethically approved KA-HDSS with the identification number IERC-0030. Moreover, an ethical approval of the consent procedure was also obtained from the Health Research Ethics Review Committee (HRERC) in Mekelle University. Since a large proportion of the study population had no formal education, verbal consent was preferred to appropriately inform the interviewee. In addition, the VA data collectors were trained on how to implement the verbal consent and they collected the data from the

primary caregivers of the deceased individuals only if they consented for the interview. KA-HDSS data is also highly protected to avoid potential access by third parties. For this purpose, the target dataset was extracted de-identifying personal identifiers to make that the dataset anonymous and maintain the confidentiality of the study participants.

## Results

### Characteristics of the study population and incidence of NCD mortality

This study was based on 45,982 adult KA-HDSS cohort members who contributed 193,758.5 person-years. The population resided in 16,247 households and the mean number of persons per household, including children, was 4. More than four-fifths ( $n = 37,549$ ; 81.7%), and about three quarters, ( $n = 32,962$ ; 74.5%), of the population were living in rural residences and mid-land geographic locations, respectively.

The median age was 32 years, with an interquartile range of 24 years. The age-dependency ratio was 14 per 100 working-age population. Although 53% of the external out-migrants were female, the female population was 3.6% higher than the male population.

As shown in [Table 1](#), about half of the population ( $n = 22,928$ ; 49.9%) were unable to read and write and more than one third ( $n = 17,701$ ; 38.5%) were unemployed. More than a third ( $n = 16,247$ ; 35.4%) and a quarter ( $n = 13,350$ ; 29%) of the participants were heads of households and economically poor, respectively ([Table 1](#)).

Across 193,758.7 person-years, the incidence density rate (IDR) of NCD mortality was 194 deaths (IDR = 194.1; 95% CI = 175.4, 214.7) per 100,000 person-years. The IDR of NCD mortality increased as age increased. The rate was 937 NCD deaths per 100,000 person-years for those who were 65 years and above. The IDR ratio of NCD mortality between 15–64 years to over 64 years was 1:12. On the other hand, the proportion of NCD deaths in the 15–64 years age group, which is interpreted as premature mortality from NCD, was 32.3%. There was a differential occurrence of NCD attributed mortality IDR with most of the other socio-demographic characteristics ([Table 1](#)).

Mortality rate of cancer, 37.4 vs. 32.1 deaths per 100,000 person-years, and cardiovascular diseases (CVDs), 83.6 vs. 78.7 deaths per 100,000 person-years, was slightly higher for males compared to females. Contrary to this, the mortality rate of renal failure was higher for females compared to males, 19 vs. 14 deaths per 100,000 person-years, respectively.

### Broad causes of death

During the surveillance period, a total of 1,091 adult deaths were observed. About four-fifths ( $n = 872$ ; 79.9%) of those died at home. Moreover, causes of death were assigned for 908 (83.2%) deaths. Of the total deceased cases, NCDs accounted for more than one-third ( $n = 376$ ; 34.5%) of all deaths. Comparable to NCDs, communicable diseases caused 360 (33%) deaths. The third leading causes of death were deaths from external causes ( $n = 126$ ; 11.5%) ([Table 2](#)).

Nearly two-thirds of the NCD attributed deaths were among those who were 65 years and above. Observably, deaths from communicable diseases were higher by about 4% for females, but about three-fourths of the deaths from external causes occurred among males. In addition, nearly three-fourths of the undetermined causes and 87.2% of the unspecified causes were among those age 65 years and above ([Table 2](#)).

### Specific NCD types as causes of death

Of the 376 NCD deaths, cerebrovascular event, cancer and renal failure were the leading causes of adult death, accounting for 83 (22.1%), 68 (18.1%) and 34 (9%) deaths, respectively.

**Table 1. Socio-demographic, economic and geographic characteristics and NCD deaths per 100,000 person-years of adult KA-HDSS cohort members from September 2009 to April 2015, northern Ethiopia (n = 45,982; 376 NCD deaths).**

| Characteristics                   | Frequency by sex |               | Total, n (%)        | person-years     | NCDs attributed deaths | IDR (95% CI)                |
|-----------------------------------|------------------|---------------|---------------------|------------------|------------------------|-----------------------------|
|                                   | Female           | Male          |                     |                  |                        |                             |
| <b>Age</b>                        |                  |               |                     |                  |                        |                             |
| 15–49 years                       | 18,747           | 15,944        | 34,691 (75.4)       | 138,249.8        | 63                     | 45.6 (35.6, 58.3)           |
| 50–64 years                       | 3,163            | 2,604         | 5,767 (12.5)        | 29,251.6         | 67                     | 229.1 (180.3, 291)          |
| ≥65 years                         | 2,715            | 2,809         | 5,524 (12.0)        | 26,257.3         | 246                    | 936.9 (826.8, 1061.6)       |
| <b>Marital status</b>             |                  |               |                     |                  |                        |                             |
| Married                           | 9,728            | 11,054        | 20,782 (45.2)       | 81,081.8         | 53                     | 65.4 (49.9, 85.6)           |
| Single                            | 10,354           | 9,552         | 19,906 (43.3)       | 91,207.8         | 187                    | 205 (177.7, 236.6)          |
| Widowed                           | 2,214            | 409           | 2,623 (5.7)         | 9,732.2          | 28                     | 287.7 (198.7, 416.7)        |
| Divorced                          | 2,320            | 334           | 2,654 (5.8)         | 11,694.0         | 104                    | 889.3 (733.8, 1077.8)       |
| <b>Education</b>                  |                  |               |                     |                  |                        |                             |
| Unable to read and write          | 13,566           | 9,362         | 22,928 (49.9)       | 107,829.8        | 312                    | 289.4 (259, 323.3)          |
| Primary                           | 6,773            | 7,298         | 14,071 (30.6)       | 57,578.7         | 44                     | 76.4 (56.9, 102.7)          |
| Secondary and above               | 4,286            | 4,697         | 8,983 (19.5)        | 28,350.1         | 20                     | 70.6 (45.5, 109.4)          |
| <b>Occupation</b>                 |                  |               |                     |                  |                        |                             |
| Unemployed                        | 8,110            | 9,591         | 17,701 (38.5)       | 57,258.9         | 19                     | 33.2 (21.2, 52)             |
| Farmer                            | 3,515            | 7,880         | 11,395 (24.8)       | 55,555.0         | 247                    | 444.6 (392.5, 503.7)        |
| Government employee and Others    | 13,000           | 3,886         | 16,886 (36.7)       | 80,944.9         | 110                    | 135.9 (112.7, 163.8)        |
| <b>Residence</b>                  |                  |               |                     |                  |                        |                             |
| Rural                             | 19,509           | 18,040        | 37,549 (81.7)       | 167,039.8        | 331                    | 198.2 (177.9, 220.7)        |
| Urban                             | 5,116            | 3,317         | 8,433 (18.3)        | 26,718.9         | 45                     | 168.4 (125.8, 225.6)        |
| <b>Wealth index</b>               |                  |               |                     |                  |                        |                             |
| Poor                              | 7,494            | 5,856         | 13,350 (29.0)       | 57,273.7         | 109                    | 190.3 (157.7, 229.6)        |
| Medium                            | 4,152            | 3,759         | 7,911 (17.2)        | 37,969.6         | 90                     | 237 (192.8, 291.4)          |
| Wealthy                           | 7,855            | 8,166         | 16,021 (34.8)       | 78,188.2         | 146                    | 186.7 (158.7, 219.6)        |
| Unknown                           | 5,124            | 3,576         | 8,700 (18.9)        | 20,327.2         | 31                     | 152.5 (107.3, 216.9)        |
| <b>Relation to household head</b> |                  |               |                     |                  |                        |                             |
| Head of household                 | 5,972            | 10,275        | 16,247 (35.4)       | 69,699.5         | 237                    | 340 (299.4, 386.2)          |
| Wife/children                     | 17,079           | 9,951         | 27,030 (58.8)       | 115,365.6        | 66                     | 57.2 (45, 72.8)             |
| Extended and non- family members  | 1,565            | 1,115         | 2,680 (5.8)         | 8,622.5          | 68                     | 788.6 (621.8, 1000.2)       |
| <b>Household headship</b>         |                  |               |                     |                  |                        |                             |
| No                                | 18,653           | 11,082        | 29,735 (64.7)       | 124,059.2        | 139                    | 112 (94.9, 132.3)           |
| Yes                               | 5,972            | 10,275        | 16,247 (35.3)       | 69,699.5         | 237                    | 340 (299.4, 386.2)          |
| <b>Sex of household head</b>      |                  |               |                     |                  |                        |                             |
| Female                            | 5,972            | 0             | 5,972 (36.8)        | 23,420.7         | 84                     | 358.7 (289.6, 444.2)        |
| Male                              | 0                | 10,275        | 10,275 (63.2)       | 46,278.8         | 153                    | 330.6 (282.2, 387.4)        |
| <b>Geographic location</b>        |                  |               |                     |                  |                        |                             |
| Midland                           | 17,599           | 15,363        | 32,962 (74.5)       | 140,823.7        | 267                    | 189.6 (168.2, 213.8)        |
| Highland                          | 6,016            | 5,252         | 11,268 (25.5)       | 50,330.5         | 107                    | 212.6 (175.9, 257)          |
| <b>Total</b>                      | <b>24,625</b>    | <b>21,357</b> | <b>45,982 (100)</b> | <b>193,758.7</b> | <b>376</b>             | <b>194.1 (175.4, 214.7)</b> |

CI: Confidence interval, IDR: Incidence density rate, NCDs: Non-communicable diseases.

<https://doi.org/10.1371/journal.pone.0188968.t001>

Moreover, 6.9% and 6.6% of the total NCD deaths were shared by ischaemic heart disease and congestive heart failure, respectively. We also found that diabetes mellitus, epilepsy, hypertensive disease, chronic liver disease and Alzheimer’s disease were the next top NCDs causing



**Table 2. Broad causes of death, stratified by age and sex, among adult KA-HDSS cohort members from September 2009 to April 2015, northern Ethiopia.**

| Broad category of cause of deaths                                   | Frequency by sex, n (%) |            | Frequency by age group, n (%) |             |            | Total, n (proportion; 95% CI) |
|---------------------------------------------------------------------|-------------------------|------------|-------------------------------|-------------|------------|-------------------------------|
|                                                                     | Female                  | Male       | 15–49 years                   | 50–64 years | ≥65 years  |                               |
| Non-communicable diseases                                           | 182 (48.4)              | 194 (51.6) | 63 (16.8)                     | 67 (17.8)   | 246 (65.4) | 376 (34.5; 31.7–37.2)         |
| Communicable diseases                                               | 194 (53.9)              | 166 (46.1) | 75 (20.8)                     | 59 (16.4)   | 226 (62.8) | 360 (33.0; 30.3–35.8)         |
| External causes of death                                            | 34 (27.0)               | 92 (73.0)  | 67 (53.2)                     | 15 (11.9)   | 44 (34.9)  | 126 (11.5; 9.8–13.6)          |
| Unspecified causes of death                                         | 24 (61.5)               | 15 (38.5)  | 2 (5.1)                       | 3 (7.7)     | 34 (87.2)  | 39 (3.6; 2.6–4.9)             |
| Other causes (pregnancy, child birth and puerperium related causes) | 7 (100)                 | 0 (0.0)    | 7 (100.0)                     | 0 (0.0)     | 0 (0.0)    | 7 (0.6; 0.3–1.3)              |
| Undetermined causes                                                 | 104 (56.8)              | 79 (43.2)  | 36 (19.7)                     | 11 (6.0)    | 136 (74.3) | 183 (16.8; 14.7–19.1)         |
| Total deaths                                                        | 544 (49.9)              | 547 (50.1) | 248 (22.7)                    | 155 (14.2)  | 688 (63.1) | 1,091                         |

CI: Confidence interval.

<https://doi.org/10.1371/journal.pone.0188968.t002>

high numbers of death in the KA-HDSS adult population (Fig 1). It is particularly important to mention that cardiovascular diseases (cerebrovascular event, ischaemic heart disease, congestive heart failure, hypertension and chronic rheumatic heart disease) accounted for 41.8% of all NCD-attributed mortality. Furthermore, gastrointestinal cancers contributed more than half (n = 37; 54.4%) of the deaths caused by all types of cancer. Of the total deaths due to all cancer types, for both men and women, nearly half of the deaths (n = 33; 48.5%)

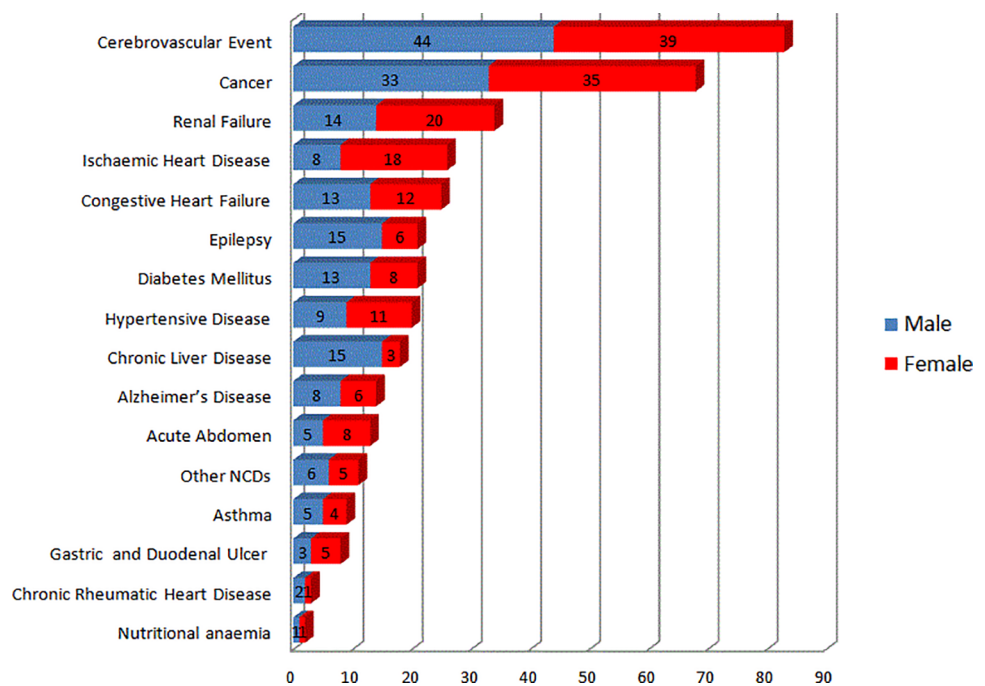

**Fig 1. The absolute number of deaths by specific NCD types and sex among the adult KA-HDSS cohort members from September 2009 to April 2015, Tigray region, northern Ethiopia (n = 376).**

<https://doi.org/10.1371/journal.pone.0188968.g001>

were caused by oesophageal cancer (22.1%), stomach cancer (13.2%), and malignant neoplasm of the large and small intestines (13.2%). Moreover, differential mortality of specific NCDs was observed by sex. Generally, listed according to their rank, chronic liver disease (83.3%), epilepsy (71.4%), diabetes mellitus (61.9%), Alzheimer's disease (57.1%), cerebrovascular events (53%) and congestive heart failure (52%) were more common causes of death among male adults, whereas renal failure, ischaemic heart disease (69.2%), gastric and duodenal ulcer (62.5%), renal failure (58%), hypertensive disease (55%) and cancer (51.5%) were more frequent causes of death among female adults (Fig 1).

## Predictors of NCD attributed mortality

Age, sex, marital status, education, occupation, wealth index, relation to household head and the interaction of education with age were included in the multivariable Cox proportional hazards regression model. The variables residence and geographic location were not accounted for in the multivariable model because these two variables were not significant in the bivariate analysis. Sex of head of the household was also not fitted in to the model because it created a severe multicollinearity problem with the relation to household variable. Therefore, interpretation of the model was done considering the controlled effect of the remaining seven variables in addition to the interaction of age and education.

Age, education, relation to head of household and the interaction of education with age were significantly associated with NCD attributed mortality.

There was a 35% excess hazard of mortality from NCDs for every 5-year increase of age. The mortality hazard from NCDs was also significantly different by educational status. Compared to those who were unable to read and write, the hazard of NCD attributed mortality was 65% lower for those who were literate. However, the reduced NCD mortality for literate individuals was significantly modified by age in that the observed positive effect was reduced by 18% for every 5-year increase in the age of the cohort.

Another striking finding was that extended family and other non-family members, such as servants, had a 2.9 times higher hazard of NCD attributed mortality compared to their respective head of household (Table 3).

On the other hand, the hazard of mortality from NCDs was not significantly different according to the wealth index of adults. However, it was observed that individuals from medium and wealthy households had a 3% and 15% lower hazard of NCD mortality, respectively, compared to individuals from poor households. Similarly, there was not a statistically significant difference in the mortality hazard from NCD by sex, occupation and marital status (Table 3).

## Discussion

Determining the mortality burden of NCDs was one of the main objectives of this study. We found that, out of the total cause ascertained deaths, NCDs accounted for a higher proportion of death (41.4%) in the predominantly rural community of northern Ethiopia.

The other primary objective of the study was to identify the socio-demographic and economic determinants of NCD mortality. In summary, age, education, relation to head of household and the interaction effect of education and age were the significant determinants of mortality from NCD. In contrast, there was no statistically different NCD mortality by sex, wealth index, occupation and marital status. However, the hazard of NCD mortality decreases with increasing wealth status.

One of our key findings is that the mortality burden from NCDs was slightly higher than infectious causes of death accounting for more than one-third of the total deaths. This clearly

**Table 3. Predictors of NCD mortality among adult KA-HDSS cohort members from 11 September 2009 to 26 April 2015, northern Ethiopia (n = 45,982).**

| Variables                         | Crude HR (95% CI)     | Adjusted HR (95% CI) |
|-----------------------------------|-----------------------|----------------------|
| <b>Age (for 5-year increase)</b>  | 1.41 (1.37, 1.45)***  | 1.35 (1.30, 1.41)*** |
| <b>Sex</b>                        |                       |                      |
| Female                            | 1.00                  | 1.00                 |
| Male                              | 1.21 (0.99, 1.48)     | 0.97 (0.73, 1.30)    |
| <b>Marital status</b>             |                       |                      |
| Married                           | 1.00                  | 1.00                 |
| Single                            | 3.19 (2.35, 4.33)**   | 0.8 (0.55, 1.19)     |
| Widowed                           | 4.44 (2.81, 7.01)**   | 0.94 (0.57, 1.54)    |
| Divorced                          | 13.81 (9.92, 19.23)** | 1.03 (0.69, 1.53)    |
| <b>Education</b>                  |                       |                      |
| Unable to read and write          | 1.00                  | 1.00                 |
| Literate                          | 0.25 (0.19, 0.33)***  | 0.35 (0.13, 0.91)*   |
| <b>Occupation</b>                 |                       |                      |
| Unemployed                        | 1.00                  | 1.00                 |
| Farmer                            | 13.7 (8.58, 21.82)*** | 1.3 (0.61, 2.80)     |
| Others                            | 4.14 (2.55, 6.74)***  | 0.63 (0.30, 1.29)    |
| <b>Residence</b>                  |                       |                      |
| Rural                             | 1.00                  |                      |
| Urban                             | 0.85 (0.62, 1.16)     |                      |
| <b>Wealth index</b>               |                       |                      |
| Poor                              | 1.00                  | 1.00                 |
| Medium                            | 1.25 (0.94, 1.65)     | 0.97 (0.73, 1.31)    |
| Wealthy                           | 0.98 (0.77, 1.26)     | 0.85 (0.65, 1.11)    |
| Unknown                           | 0.79 (0.53, 1.17)     | 1.08 (0.72, 1.62)    |
| <b>Relation to household head</b> |                       |                      |
| Head of household                 | 1.00                  | 1.00                 |
| Wife/children                     | 0.17 (0.13, 0.22)***  | 1.23 (0.82, 1.84)    |
| Extended family & other members   | 2.30 (1.76, 3.02)***  | 2.86 (2.05, 3.98)*** |
| <b>literate#age_5year</b>         |                       | 1.18 (1.10, 1.27)*** |
| <b>Household headship</b>         |                       |                      |
| No                                | 1.00                  |                      |
| Yes                               | 3.06 (2.48, 3.77)***  |                      |
| <b>Sex of household head</b>      |                       |                      |
| Female                            | 1.00                  |                      |
| Male                              | 0.92 (0.71, 1.20)     |                      |
| <b>Geographic location</b>        |                       |                      |
| Midland                           | 1.00                  |                      |
| Highland                          | 1.12 (0.90, 1.4)      |                      |

CI: Confidence interval, HR: Hazard ratio.

\*p<0.05.

\*\* p<0.01.

\*\*\* p<0.001.

<https://doi.org/10.1371/journal.pone.0188968.t003>

indicates that the double mortality burden from both NCDs and communicable diseases is evident in the community. The proportion of mortality burden shared by NCDs, which falls between 31.7% and 37.3% at 95% CI, is higher than in previous studies from Ethiopia [20, 77–

79], Africa [80–82] and another cross-continental study conducted in similar research settings located in Africa and Asia [58]. The current finding is also higher than the 30% NCD mortality mentioned in the 2014 WHO mortality report for Ethiopia [83]. However, it is lower than the finding of 56.8% from the Global Burden of Disease (GBD) estimation for 2015 [84]. This study has illuminated the hidden consequences of NCDs, the most severe being mortality. It has uncovered that mortality burden of NCDs has slightly prevailed over communicable diseases or injuries and this substantiates the fact that epi-demographic transition [20, 85–87] is emerging in the community. One of the possible explanations for the slightly higher proportion of NCD-attributed mortality in our population could be due to the significant decline in communicable diseases increasing the life expectancy of Ethiopians. From 1990 to 2015, the age-standardised national annual percentage drop of communicable, neonato-maternal and nutritional diseases was 4.2% [84]. This decrease in communicable diseases could merely be a result of the functional relevance of the investment in public infrastructures such as public health centres particularly during the past decade [88, 89].

The 2015 World Health Statistics release indicated that life expectancy at birth of Ethiopians between 1990s and 2013 increased by about 20 years [15]. Similarly, according to the United Nations Development Report (UNDP), Ethiopia gained a life expectancy of 20.4 years between 1980 and 2014 [88]. Although lower than the above-mentioned results, a more recent global health study by Wang et.al showed that male and female Ethiopians gained a life expectancy of 7.6 and 10.7 years, respectively [90]. Generally, the results show a gain in life expectancy for Ethiopia although there exists variation in the estimated years of gain. Additionally, based on our data, the median age of the deceased individuals was 70 years with an IQR of 59.5–80 years compared to the median age of 31 years with an IQR of 23–46 years for the alive and migrated cohorts. Accordingly, it seems reasonable that we can think of increased life expectancy as one of the partially explaining demographic phenomenon for the comparably high NCD mortality observed in our population [87].

On the other hand, despite Ethiopia's reportedly significant achievement in economic growth, the country is still one of the poorest nations with a HDI of 0.442, which falls below the average HDI of 0.505 for countries in the low human development group, ranking 174 out of 188 countries [88]. Even though the Federal Ministry of Health (FMOH) has recently started to pay attention and respond to the emergence of NCDs [91], the large burden of communicable diseases, especially among younger age groups, seems to influence much of the operational focus of the ministry office. Moreover, patients' poor use and access to early diagnosis and treatment, aggravated by the poor health insurance coverage in the study area, may also have contributed to the high NCD attributed mortality. In addition to these factors, the high population-to-health workforce ratio and extremely low density of well-equipped hospitals to population could have exacerbated the mortality from NCDs [15, 41, 88]. Moreover, the healthcare-seeking practice of NCD patients might also be low, as revealed in Malawi [92], eventually leading to premature mortality. Another explanation for this is that only 14.4% of the NCD patients died at health facilities, which can further elucidate the fact that the healthcare services utilization of NCD patients might have been poor assuming death at health facilities, from the context of developing countries, as a proxy indicator of access to and utilization of healthcare services during a terminal illness [41].

In this study, CVDs, cancer and renal failure were the leading NCDs accounting for more than two-thirds, one-fifth and one-tenth of NCD-ascribed deaths respectively. This result is in line with earlier research findings from Ethiopia [20, 77, 79]. The epidemiological fact behind the disproportionate observation of renal failure and ischaemic heart disease attributed deaths among females and oesophageal cancer and chronic liver disease among males is worth investigating. However, our observation of higher occurrence of oesophageal cancer and chronic

liver disease as causes of death among males could be related to the higher alcohol consumption among the male population, similar to the study from Sri Lanka [93]. Furthermore, in this study, a large share of the NCD deaths were caused by CVDs. This is consistent with other studies which demonstrated that CVDs are the single most important cause of mortality and disability in low and middle-income countries [14, 18, 80, 94–97].

In this study, a 5-year increase in age was associated with 35% higher hazard of mortality from NCDs. In 2015, aging was reported to be the most important factor for the increased occurrence of NCD morbidity and mortality [7]. This might be justified by the fact that NCD risk factors are likely to accumulate with increasing age [58, 98].

Our study provides strong insight into the inverse effect of education on NCD-attributed mortality. Adjusting the effects of the fitted covariates, adults who were unable to read and write were at a higher hazard of mortality from NCDs compared to those who were literate. Our finding substantiates several previous prospective study findings which demonstrated that lower educational attainment is associated with higher cardiovascular, cancer and other NCD-related mortality [31–33, 38, 99–101]. The significant effect of education on reducing NCD attributed mortality may partly be explained by lower healthcare utilisation and disparity in the severity of disease prognosis among the non-literate group [33, 41]. Moreover, education could promote the adoption of healthy behaviours more easily and the avoidance of unhealthy habits which could finally avert mortality from NCDs such as diabetes mellitus and enhance healthcare-seeking behaviour during terminal illness [32, 102]. Although our observation of a strong association of literacy with reduction of NCD mortality is not adjusted for the established lifestyle NCD risk factors, in two largest prospective cohort studies, that had 303,036 and 39, 228 study participants, it was reported that lower education remained a significant predictor of mortality from CVDs or premature mortality, even after adjustment for these factors [31, 33]. This finding may have an important public health implication with respect to preventing adult mortality from NCDs. The possibly higher health service utilization by the literate group, as shown in previous studies, could partly account for the observed difference among the cohorts [41]. However, further research needs to be undertaken to decode the details of different pathways on how education could mediate or causally influence NCD mortality in the rural setting of the population. This could be of paramount importance for designing effective interventions to address NCD mortality. In this study, the protective effect of literacy was strongly modified by increasing age. This significant attenuating effect of age on the protective effect of education may highlight the reality that aging stands as a dominant risk factor to NCD-attributed mortality.

One of the interesting findings of our study was that NCD-attributed mortality was significantly different depending on the type of relationship household members have with their respective head of household. Extended family and non-family household members were at a significantly increased hazard of NCD mortality compared to the household head. As to our update, published research works linking adult mortality from NCDs and household headship are unavailable. Yet, one study found that being head of household significantly reduced elderly mortality for both sexes. Nonetheless, this effect was found to decline with increasing age of the household heads [57]. The relationship of family members to the head of households has also a vital implication to the survival of children. There is supporting evidence which shows that children who lived in households headed by persons other than their parents faced a relative survival disadvantage [56]. It has been reported that NCDs pose a significant economic burden to households by means of catastrophic hospitalization expenditure and productivity loss [9, 10]. In developing countries, where the health care costs are mostly covered by the patients, the adverse economic effect of catastrophic out of pocket expenses disproportionately affects the poor and vulnerable segments of the population [10]. As such, it is possible

that the healthcare-seeking practice and access to medicines by these vulnerable household members might have been excessively impeded which could have led to the significantly excess hazard of NCD ascribed mortality among these co-residents. Moreover, extended family and non-family members are less likely to access household resources since, in the cultural context of the study area, household related decisions, such as spending decisions, are primarily made by the heads of the households. Similarly, in one longitudinal study, it was explained that joint household resources were allocated differentially and accessed greatly by household heads and their wives [57]. Furthermore, illness from NCDs is generally characterised by long-term morbidity compared to communicable diseases, which could also predispose NCD patients who were not closely related to the household heads, to poorer care-seeking behaviour. This could evidently be aggravated by lifelong medical expenditures and the probable family fatigue as a result of long-term care [10, 103]. Conclusively, we observed that intra-household structure and relationships have significance in terms of excess NCD-related mortality among extended family and non-family co-residents within households. Therefore, we strongly recommend that public health interventions, such as community-based health insurance, should consider the intra-household structure and relationships, particularly giving focus to vulnerable co-residents, to significantly prevent NCD-attributed mortality.

Our study did not find a statistically significant difference in NCD mortality by wealth index. Nevertheless, the study demonstrated that individuals who had wealthy asset status had a lower hazard of NCD mortality compared to those who were poor individuals. This may show the positive survival gain of higher economic status in relation to reducing the hazard of adult mortality from NCDs. Similar to our study, other groups did not find a statistically significant difference between wealth and acute myocardial infarction mortality (AMI) [104], wealth and cancer mortality [55]. In contrast, several other studies showed a statistically significant association of wealth with all-cause and NCD mortality [52, 53, 55, 105]. The reason for the finding of insignificant association of wealth with NCD mortality is unclear, but it could be partially attributed to the fact that non-governmental micro-lending service is commonly practiced in the study area, which could have diluted the effect of wealth status on NCD mortality. On the other hand, for some reasons, it is mentioned that wealth status of individuals estimated from household wealth measures, such as household wealth index, could be an unreliable measure of individual economic position [106]. Controlling the effect of education and all other fitted covariates, unemployment was not a significant factor for NCD mortality. This finding is rather contradictory to the evidence from previous research works [44, 46]. This could be explained by the strong correlation of education, income and occupation; however, education is consistently the strongest indicator, proofing its causal effect, compared to the two parameters [27–30].

The results of this study could be generalizable to many developing countries taking in to account the mostly similar situations of low literacy level and patricentric household headship, which is a proxy indicator of differential individual access to within household resources [57], in most rural areas of such countries. One should, however, notice that the results should be utilized with great prudence because NCD patients living in these different countries are exposed to different health system, social and cultural contexts, where the generalization may not be applicable. Contrary to this, we expect that our findings may not be generalized to NCD patients living in developed countries due to the likely better survival resulting from better health insurance coverage. Moreover, the higher literacy level and different family composition and structure in developed countries may also create distinctive contexts where the results of the current study may not be directly inferred. Nevertheless, this does not imply that the results will not have relevance to such economically thrived part of the world.

Our study is based on highly trained and experienced enumerators who collected the population-based longitudinal data using standardized data collection tools and procedures. An

additional strength of the study is that it is based on a large number of participants followed over long period of time. However, the study is not without limitations. One major limitation of the study is that undetermined and unspecified causes of death, 16.8% and 3.6% respectively, accounted for about one-fifth of the total causes of death. This may be due to the fact that physician review based verbal autopsy is less accurate in determining causes of death as compared to other methods [65, 107]. It could be difficult to clearly determine how this has already impacted our results; however, assuming aging as a principal factor for the occurrence of NCDs among elderly adults [98], we think that this might have reduced the burden of NCD mortality because 76.6% of the undetermined and unspecific causes were among adults aged 65 years and above. The second limitation is that the absence of data for some important variables such as the classical NCD risk factors, which may further explain the disparity in NCD mortality, should also be mentioned as a limitation of our study.

## Conclusion

In summary, our study has found a high mortality burden from NCDs. The evidence from this study indicates that older age, non-literacy, and being an extended family or non-family member of the household head, show a disparity of significantly higher NCD attributed adult mortality in the project area. This study has enhanced our understanding of social determinants in the context of a predominantly rural community of Ethiopia. Future public health interventions should integrate these findings to plan interventions in those vulnerable groups to meaningfully reduce adult NCD mortality. Further research, combining quantitative and qualitative approaches, needs to be implemented to disentangle the different possible pathways education and intra-household composition and relationships follow to result in differential adult mortality from NCDs.

## Supporting information

**S1 Fig. A conceptual framework of the social determinants of NCD attributed adult mortality.**

(TIF)

**S1 Table. Predictors of NCD mortality based on sensitivity analysis.**

(RTF)

**S1 Data Collection tools.**

(ZIP)

## Acknowledgments

We gratefully acknowledge the study participants and field staff of KA-HDSS. We are also grateful to the Centers for Disease Control and Prevention (CDC) for funding our surveillance research through the Ethiopian Public Health Association (EPHA). The authors are also thankful to DAAD through the Food Security Center (FSC) at the University of Hohenheim for the scholarship opportunity given to the first author in his PhD study.

## Author Contributions

**Conceptualization:** Semaw Ferede Abera, Veronika Scherbaum, Eva Johanna Kantelhardt.

**Data curation:** Semaw Ferede Abera, Andreas Wienke.

**Formal analysis:** Semaw Ferede Abera, Andreas Wienke.

**Funding acquisition:** Semaw Ferede Abera, Alemseged Aregay Gebru, Hans Konrad Biesalski, Andreas Wienke, Veronika Scherbaum, Eva Johanna Kantelhardt.

**Investigation:** Semaw Ferede Abera, Alemseged Aregay Gebru, Hans Konrad Biesalski, Andreas Wienke, Veronika Scherbaum, Eva Johanna Kantelhardt.

**Methodology:** Semaw Ferede Abera, Andreas Wienke, Veronika Scherbaum, Eva Johanna Kantelhardt.

**Project administration:** Semaw Ferede Abera, Hans Konrad Biesalski, Gebisa Ejeta, Andreas Wienke, Veronika Scherbaum, Eva Johanna Kantelhardt.

**Resources:** Semaw Ferede Abera, Alemseged Aregay Gebru, Hans Konrad Biesalski, Andreas Wienke, Veronika Scherbaum, Eva Johanna Kantelhardt.

**Software:** Semaw Ferede Abera.

**Supervision:** Semaw Ferede Abera, Alemseged Aregay Gebru, Hans Konrad Biesalski, Gebisa Ejeta, Andreas Wienke, Veronika Scherbaum, Eva Johanna Kantelhardt.

**Validation:** Semaw Ferede Abera, Alemseged Aregay Gebru, Andreas Wienke, Veronika Scherbaum, Eva Johanna Kantelhardt.

**Visualization:** Semaw Ferede Abera, Andreas Wienke, Veronika Scherbaum, Eva Johanna Kantelhardt.

**Writing – original draft:** Semaw Ferede Abera.

**Writing – review & editing:** Semaw Ferede Abera, Hans Konrad Biesalski, Gebisa Ejeta, Andreas Wienke, Veronika Scherbaum, Eva Johanna Kantelhardt.

## References

1. Kim HC, Oh SM. Noncommunicable diseases: current status of major modifiable risk factors in Korea. *Journal of preventive medicine and public health*. 2013; 46(4):165–72. <https://doi.org/10.3961/jpmph.2013.46.4.165> PMID: 23946874
2. World Health Organization. Non-communicable diseases. 2015. In: *Health in 2015: from MDGs to SDGs* [cited 2016 Dember 2016]. Geneva, Switzerland: World Health Organization [204]. Available from: <http://goo.gl/VUaCs>.
3. Lozano R, Naghavi M, Foreman K, Lim S, Shibuya K, Aboyans V, et al. Global and regional mortality from 235 causes of death for 20 age groups in 1990 and 2010: a systematic analysis for the Global Burden of Disease Study 2010. *Lancet*. 2012; 380(9859):2095–128. [https://doi.org/10.1016/S0140-6736\(12\)61728-0](https://doi.org/10.1016/S0140-6736(12)61728-0) PMID: 23245604
4. Bousquet J, Jorgensen C, Dauzat M, Cesario A, Camuzat T, Bourret R, et al. Systems medicine approaches for the definition of complex phenotypes in chronic diseases and ageing. From concept to implementation and policies. *Current pharmaceutical design*. 2014; 20(38):5928–44. PMID: 24641234
5. Global Burden of Disease Study C. Global, regional, and national incidence, prevalence, and years lived with disability for 301 acute and chronic diseases and injuries in 188 countries, 1990–2013: a systematic analysis for the Global Burden of Disease Study 2013. *Lancet*. 2015; 386(9995):743–800. [https://doi.org/10.1016/S0140-6736\(15\)60692-4](https://doi.org/10.1016/S0140-6736(15)60692-4) PMID: 26063472
6. Mortality GBD, Causes of Death C. Global, regional, and national age-sex specific all-cause and cause-specific mortality for 240 causes of death, 1990–2013: a systematic analysis for the Global Burden of Disease Study 2013. *Lancet*. 2015; 385(9963):117–71. [https://doi.org/10.1016/S0140-6736\(14\)61682-2](https://doi.org/10.1016/S0140-6736(14)61682-2) PMID: 25530442
7. Prince MJ, Wu F, Guo Y, Gutierrez Robledo LM, O'Donnell M, Sullivan R, et al. The burden of disease in older people and implications for health policy and practice. *Lancet*. 2015; 385(9967):549–62. [https://doi.org/10.1016/S0140-6736\(14\)61347-7](https://doi.org/10.1016/S0140-6736(14)61347-7) PMID: 25468153
8. Global Burden of Disease Cancer C, Fitzmaurice C, Dicker D, Pain A, Hamavid H, Moradi-Lakeh M, et al. The Global Burden of Cancer 2013. *JAMA oncology*. 2015; 1(4):505–27. <https://doi.org/10.1001/jamaoncol.2015.0735> PMID: 26181261



9. Engalgau MM, Karan A, Mahal A. The Economic impact of Non-communicable Diseases on households in India. *Global Health* 2012; 8(9).
10. Engalgau M, Rosenhouse S, El-Saharty S, Mahal A. The economic effect of noncommunicable diseases on households and nations: a review of existing evidence. *J Health Commun* 2011; 16(2):75–81.
11. Abegunde DO, Mathers CD, Adam T, Ortegón M, Strong K. The burden and costs of chronic diseases in low-income and middle-income countries. *Lancet*. 2007; 370(9603):1929–38. [https://doi.org/10.1016/S0140-6736\(07\)61696-1](https://doi.org/10.1016/S0140-6736(07)61696-1) PMID: 18063029
12. Beran D, Zar HJ, Perrin C, Menezes AM, Burney P, Forum of International Respiratory Societies working group c. Burden of asthma and chronic obstructive pulmonary disease and access to essential medicines in low-income and middle-income countries. *The Lancet Respiratory medicine*. 2015; 3(2):159–70. [https://doi.org/10.1016/S2213-2600\(15\)00004-1](https://doi.org/10.1016/S2213-2600(15)00004-1) PMID: 25680912
13. Misganaw A, DH M, Araya T. The Double Mortality Burden Among Adults in Addis Ababa, Ethiopia, 2006–2009. *Prevention of Chronic Diseases*. 2012; 9.
14. Roth GA, Huffman MD, Moran AE, Feigin V, Mensah GA, Naghavi M, et al. Global and regional patterns in cardiovascular mortality from 1990 to 2013. *Circulation*. 2015; 132(17):1667–78. <https://doi.org/10.1161/CIRCULATIONAHA.114.008720> PMID: 26503749
15. World Health Organization. Global health indicators. World Health Statistics. Geneva, Switzerland World Health Organization; 2015.
16. World Health Organization. Health in 2015: from MDGs to SDGs Geneva, Switzerland: World Health Organization, 2015.
17. WHO Global Forum, World Health Organization. Addressing the Challenge of Non-communicable Diseases. Moscow, Russian Federation: 2011.
18. World Health Organization. Global Status Report on noncommunicable diseases: Attaining the nine global non-communicable diseases targets; a shared responsibility. Geneva, Switzerland World Health Organization, 2014.
19. United Nation. Transforming Our World: The 2030 Agenda for Sustainable Development. New York: 2015.
20. Weldearegawi B, Ashebir Y, Gebeye E, Gebregziabihier T, Yohannes M, Mussa S, et al. Emerging chronic non-communicable diseases in rural communities of Northern Ethiopia: evidence using population-based verbal autopsy method in Kilite Awlaelo surveillance site. *Health policy and planning*. 2013; 28(8):891–8. <https://doi.org/10.1093/heapol/czs135> PMID: 23293101
21. Raphael D. Social determinants of health: present status, unanswered questions, and future directions. *International journal of health services: planning, administration, evaluation*. 2006; 36(4):651–77.
22. Petersen PE, Kwan S. Equity, social determinants and public health programmes—the case of oral health. *Community dentistry and oral epidemiology*. 2011; 39(6):481–7. <https://doi.org/10.1111/j.1600-0528.2011.00623.x> PMID: 21623864
23. Bor J, Cohen GH, Galea S. Population health in an era of rising income inequality: USA, 1980–2015. *Lancet*. 2017; 389(10077):1475–90. [https://doi.org/10.1016/S0140-6736\(17\)30571-8](https://doi.org/10.1016/S0140-6736(17)30571-8) PMID: 28402829
24. Marmot M. Social determinants of health inequalities. *The Lancet*. 2005; 365(9464):1099–104.
25. Carey G, Crammond B. Systems change for the social determinants of health. *BMC public health*. 2015; 15(1):662.
26. World Health Organization Commission on Social Determinants of Health. Equity, social determinants and public health programmes. Geneva, Switzerland: World Health Organization; 2010.
27. Winkleby MA, Jatulis DE, Frank E, Fortmann SP. Socioeconomic status and health: how education, income, and occupation contribute to risk factors for cardiovascular disease. *Am J Public Health* 1992; 86(2):816–20.
28. Sumanen H, Pietiläinen O, Lahti J, Lahelma E, Rahkonen O. Interrelationships between education, occupational class and income as determinants of sickness absence among young employees in 2002–2007 and 2008–2013. *BMC public health*. 2015; 15:332. <https://doi.org/10.1186/s12889-015-1718-1> PMID: 25888526
29. Krueger PM, Tran MK, Hummer RA, Chang VW. Mortality Attributable to Low Levels of Education in the United States. *PloS one*. 2015; 10(7):e0131809. <https://doi.org/10.1371/journal.pone.0131809> PMID: 26153885
30. Muller A. Education, income inequality, and mortality: a multiple regression analysis. *BMJ*. 2002; 324(7328):23–5. PMID: 11777800

31. Woodward M, Peters SA, Batty GD, Ueshima H, Woo J, Giles GG, et al. Socioeconomic status in relation to cardiovascular disease and cause-specific mortality: a comparison of Asian and Australasian populations in a pooled analysis. *BMJ open*. 2015; 5(3):e006408. <https://doi.org/10.1136/bmjopen-2014-006408> PMID: 25783421
32. Rawshani A, Svensson AM, Rosengren A, Eliasson B, Gudbjornsdottir S. Impact of Socioeconomic Status on Cardiovascular Disease and Mortality in 24,947 Individuals With Type 1 Diabetes. *Diabetes care*. 2015; 38(8):1518–27. <https://doi.org/10.2337/dc15-0145> PMID: 25972573
33. Ito S, Takachi R, Inoue M, Kurahashi N, Iwasaki M, Sasazuki S, et al. Education in relation to incidence of and mortality from cancer and cardiovascular disease in Japan. *European journal of public health*. 2008; 18(5):466–72. <https://doi.org/10.1093/eurpub/ckn052> PMID: 18628318
34. Choi BY, Lee DC, Chun EH, Lee JY. The Relationship between Metabolic Syndrome and Childhood Maternal Education Level, Job Status Findings from the Korean National Health and Nutrition Examination, 2007–2009. *Korean journal of family medicine*. 2014; 35(4):207–15. <https://doi.org/10.4082/kjfm.2014.35.4.207> PMID: 25120892
35. Forssas E, Manderbacka K, Arffman M, Keskimaki I. Socio-economic predictors of mortality among diabetic people. *European journal of public health*. 2012; 22(3):305–10. <https://doi.org/10.1093/eurpub/ckr044> PMID: 21498561
36. Tjepkema M, Wilkins R, Long A. Cause-specific mortality by education in Canada: a 16-year follow-up study. *Health reports*. 2012; 23(3):23–31. PMID: 23061261
37. Trewin CB, Strand BH, Weedon-Fekjaer H, Ursin G. Changing patterns of breast cancer incidence and mortality by education level over four decades in Norway, 1971–2009. *European journal of public health*. 2017; 27(1):160–6. <https://doi.org/10.1093/eurpub/ckw148> PMID: 28177482
38. Tjepkema M, Wilkins R, Goedhuis N, Pennock J. Cardiovascular disease mortality among First Nations people in Canada, 1991–2001. *Chronic diseases and injuries in Canada*. 2012; 32(4):200–7. PMID: 23046802
39. Bijwaard GE, van Poppel F, Ekamper P, Lumey LH. Gains in Life Expectancy Associated with Higher Education in Men. *PloS one*. 2015; 10(10):e0141200. <https://doi.org/10.1371/journal.pone.0141200> PMID: 26496647
40. Steingrimsdottir OA, Naess O, Moe JO, Groholt EK, Thelle DS, Strand BH, et al. Trends in life expectancy by education in Norway 1961–2009. *European journal of epidemiology*. 2012; 27(3):163–71. <https://doi.org/10.1007/s10654-012-9663-0> PMID: 22392586
41. Chisumpaa VH, Odimegwub CO, Wet ND. Adult mortality in sub-saharan Africa, Zambia: Where do adults die? *SSM- Population Health*. 2017; 3:227–35.
42. Spoerri A, Schmidlin K, Richter M, Egger M, Clough-Gorr KM, Swiss National C. Individual and spousal education, mortality and life expectancy in Switzerland: a national cohort study. *Journal of epidemiology and community health*. 2014; 68(9):804–10. <https://doi.org/10.1136/jech-2013-203714> PMID: 24764353
43. Zagozdzon P, Parszuto J, Wrotkowska M, Dydjow-Bendek D. Effect of unemployment on cardiovascular risk factors and mental health. *Occupational medicine*. 2014; 64(6):436–41. <https://doi.org/10.1093/occmed/kqu044> PMID: 24727560
44. Meneton P, Kesse-Guyot E, Mejean C, Fezeu L, Galan P, Hercberg S, et al. Unemployment is associated with high cardiovascular event rate and increased all-cause mortality in middle-aged socially privileged individuals. *International archives of occupational and environmental health*. 2015; 88(6):707–16. <https://doi.org/10.1007/s00420-014-0997-7> PMID: 25385250
45. Gonzalez-Chica DA, Adams R, Dal Grande E, Avery J, Hay P, Stocks N. Lower educational level and unemployment increase the impact of cardiometabolic conditions on the quality of life: results of a population-based study in South Australia. *Quality of life research: an international journal of quality of life aspects of treatment, care and rehabilitation*. 2017; 26(6):1521–30.
46. Tsai SL, Lan CF, Lee CH, Huang N, Chou YJ. Involuntary unemployment and mortality in Taiwan. *Journal of the Formosan Medical Association = Taiwan yi zhi*. 2004; 103(12):900–7. PMID: 15624038
47. Tefft N, Kageleiry A. State-level unemployment and the utilization of preventive medical services. *Health services research*. 2014; 49(1):186–205. <https://doi.org/10.1111/1475-6773.12091> PMID: 23855636
48. Kondo N, Sembajwe G, Kawachi I, van Dam RM, Subramanian SV, Yamagata Z. Income inequality, mortality, and self-rated health: meta-analysis of multilevel studies. *BMJ*. 2009; 339(b4471).
49. Laynte R. The association between income inequality and mental health: Testing status anxiety, social capital, and neo-materialist explanations. *European Sociological Review*. 2012; 28(4):498–511.
50. McDonough P, Duncan GJ, Williams D, House J. Income dynamics and adult mortality in the United States, 1972 through 1989. *Am J Public Health*. 1997; 87(9):1476–83. PMID: 9314800

51. Martikainen P, Adda J, Ferrie JE, Davey Smith G, Marmot M. Effects of income and wealth on GHQ depression and poor self-rated health in white collar women and men in the Whitehall II study. *Journal of epidemiology and community health*. 2003; 57(9):718–23. <https://doi.org/10.1136/jech.57.9.718> PMID: 12933779
52. Khan JA, Trujillo AJ, Ahmed S, Siddiquee AT, Alam N, Mirelman AJ, et al. Distribution of chronic disease mortality and deterioration in household socioeconomic status in rural Bangladesh: an analysis over a 24-year period. *International journal of epidemiology*. 2015; 44(6):1917–26. <https://doi.org/10.1093/ije/dyv197> PMID: 26467760
53. Parise CA, Caggiano V. Disparities in race/ethnicity and socioeconomic status: risk of mortality of breast cancer patients in the California Cancer Registry, 2000–2010. *BMC cancer*. 2013; 13:449. <https://doi.org/10.1186/1471-2407-13-449> PMID: 24083624
54. Kondo N, van Dam RM, Sembajwe G, Subramanian SV, Kawachi I, Yamagata Z. Income inequality and health: the role of population size, inequality threshold, period effects and lag effects. *Journal of epidemiology and community health*. 2012; 66(6):e11. <https://doi.org/10.1136/jech-2011-200321> PMID: 22012964
55. Demakakos P, Biddulph JP, Bobak M, Marmot MG. Wealth and mortality at older ages: a prospective cohort study. *Journal of epidemiology and community health*. 2016; 70(4):346–53. <https://doi.org/10.1136/jech-2015-206173> PMID: 26511887
56. Islam MM, Azad KM. Rural-urban migration and child survival in urban Bangladesh: are the urban migrants and poor disadvantaged? *J Biosoc Sci* 2008; 40(1):83–96. <https://doi.org/10.1017/S0021932007002271> PMID: 17640395
57. Rahman MO. Age and gender variation in the impact of household structure on elderly mortality. *International journal of epidemiology*. 1999; 28(3):485–91. PMID: 10405853
58. Streatfield PK, Khan WA, Bhuiya A, Hanifi SM, Alam N, Bagagnan CH, et al. Adult non-communicable disease mortality in Africa and Asia: evidence from INDEPTH Health and Demographic Surveillance System sites. *Global health action*. 2014; 7:25365.
59. Roy-Byrne PP, Joesch JM, Wang PS, Kessler RC. Low socioeconomic status and mental health care use among respondents with anxiety and depression in the NCS-R. *Psychiatr Serv*. 2009; 60(9):1190–7. <https://doi.org/10.1176/ps.2009.60.9.1190> PMID: 19723733
60. Weldearegawi B, Spigt M, Berhane Y, Dinant G. Mortality level and predictors in a rural Ethiopian population: community based longitudinal study. *PLoS one*. 2014; 9(3):e93099. <https://doi.org/10.1371/journal.pone.0093099> PMID: 24675840
61. Phillips DE, AbouZahr C, Lopez AD, Mikkelsen L, de Savigny D, Lozano R, et al. Are well functioning civil registration and vital statistics systems associated with better health outcomes? *The Lancet*. 2015; 386 (1001):1386–94.
62. Ye Y, Wamukoya M, Ezeh A, Emina JB, Sankoh O. Health and demographic surveillance systems: a step towards full civil registration and vital statistics system in sub-Saharan Africa? *BMC public health*. 2012; 12 (741).
63. Sankoh O, Byass P. The INDEPTH Network: filling vital gaps in global epidemiology. *International journal of epidemiology*. 2012; 41(3):579–88. <https://doi.org/10.1093/ije/dys081> PMID: 22798690
64. INDEPTH Network. INDEPTH Network: Membership in 2017 2016 [cited 2017 July 19]. Available from: available at <http://www.indepth-network.org/about-us>.
65. Lozano R, Freeman MK, James SL, Campbell B, Lopez AD, Flaxman AD, et al. Performance of InterVA for assigning causes of death to verbal autopsies: multisite validation study using clinical diagnostic gold standards. *Population health metrics*. 2011; 9(50).
66. Fottrell E, Byass P. Verbal autopsy: methods in transition. *Epidemiologic reviews*. 2010; 32:38–55. <https://doi.org/10.1093/epirev/mxq003> PMID: 20203105
67. Murray CJ, Lopez AD, Shibuya K, Lozano R. Verbal autopsy: advancing science, facilitating application. *Population health metrics*. 2011; 9:18. <https://doi.org/10.1186/1478-7954-9-18> PMID: 21794169
68. Fottrell E. Dying to count: mortality surveillance in resource-poor settings. *Global health action*. 2009; 2.
69. World Health Organization. International Statistical Classification of Diseases and Related Health Problems 10th Revision (ICD-10) Version for 2010. 2010.
70. World Health Organization. Social determinants of health [cited 2016 April 19].
71. Vyas S, Kumaranayake L. Constructing socio-economic status indices: how to use principal components analysis. *Health policy and planning*. 2006; 21(6):459–68. <https://doi.org/10.1093/heapol/czl029> PMID: 17030551
72. Lee ET, Go OT. Survival Analysis in Public Health Research. *Annu Rev Public Health*. 1997; 18:105–34. <https://doi.org/10.1146/annurev.publhealth.18.1.105> PMID: 9143714

73. Hosmer D, Lemeshow S. *Applied Survival Analysis Regression Modeling of Time to Event Data: A Wiley-Interscience Publication*; 1999.
74. Hess KR. Graphical methods for assessing violations of the proportional hazards assumption in cox regression. 14. 1995; *Statistics in Medicine*(15):1707–23. PMID: [7481205](#)
75. Grambsch PM, Therneau TM. Proportional Hazards Tests and Diagnostics Based on Weighted Residuals. *Biometrika*. 1994; 81(3):515–26
76. O'Brien RM. A Caution Regarding Rules of Thumb for Variance Inflation Factors *Quality & Quantity*. 2007; 41(5).
77. Misganaw A, Mariam DH, Ali A, Araya T. Epidemiology of major non-communicable diseases in Ethiopia: a systematic review. *Journal of health, population, and nutrition*. 2014; 32(1):1–13. PMID: [24847587](#)
78. Misganaw A, Mariam DH, Araya T. The double mortality burden among adults in Addis Ababa, Ethiopia, 2006–2009. *Preventing chronic disease*. 2012; 9:E84. PMID: [22498035](#)
79. Misganaw A, Mariam DH, Araya T, Ayele K. Patterns of mortality in public and private hospitals of Addis Ababa, Ethiopia. *BMC public health*. 2012; 12:1007. <https://doi.org/10.1186/1471-2458-12-1007> PMID: [23167315](#)
80. Nojilana B, Bradshaw D, Pillay-van Wyk V, Msemburi W, Laubscher R, Somdya NI, et al. Emerging trends in non-communicable disease mortality in South Africa, 1997–2010. *South African medical journal = Suid-Afrikaanse tydskrif vir geneeskunde*. 2016; 106(5):477–84.
81. Oti SO, van de Vijver S, Kyobutungi C. Trends in non-communicable disease mortality among adult residents in Nairobi's slums, 2003–2011: applying InterVA-4 to verbal autopsy data. *Global health action*. 2014; 7:25533.
82. Rossier C, Soura AB, Duthe G, Findley S. Non-Communicable Disease Mortality and Risk Factors in Formal and Informal Neighborhoods, Ouagadougou, Burkina Faso: Evidence from a Health and Demographic Surveillance System. *PloS one*. 2014; 9(12):e113780. <https://doi.org/10.1371/journal.pone.0113780> PMID: [25493649](#)
83. World Health Organization. *Noncommunicable diseases country profiles* Geneva, Switzerland: 2014.
84. IHME. *GBD Compare Data Visualization*. Seattle, WA: University of Washington 2016.
85. Ben Romdhane H, Haouala H, Belhani A, Drissa H, Kafsi N, Boujnah R, et al. [Epidemiological transition and health impact of cardiovascular disease in Tunisia]. *La Tunisie medicale*. 2005; 83 Suppl 5:1–7.
86. Bovet P. The epidemiologic transition to chronic diseases in developing countries: cardiovascular mortality, morbidity, and risk factors in Seychelles (Indian Ocean). *Investigators of the Seychelles Heart Study. Sozial- und Praventivmedizin*. 1995; 40(1):35–43. PMID: [7900434](#)
87. Santosa A, Wall S, Fottrell E, Hogberg U, Byass P. The development and experience of epidemiological transition theory over four decades: a systematic review. *Global health action*. 2014; 7:23574.
88. United Nations Development Programme. *Accelerating Inclusive Growth for Sustainable Human Development in Ethiopia*. UNDP, 2014.
89. Central Statistical Agency [Ethiopia], ICF International. *Ethiopia Demographic and Health Survey 2011*. Addis Ababa, Ethiopia, Maryland, USA: Central Statistical Agency and ICF International, 2012.
90. Wang H, Naghavi M, Allen C, Barber RM, Bhutta ZA, Carter A, et al. Global, regional, and national life expectancy, all-cause mortality, and cause-specific mortality for 249 causes of death, 1980–2015: a systematic analysis for the Global Burden of Disease Study 2015. *The Lancet*. 2016; 388::1459–544.
91. The Federal Democratic Republic of Ethiopia Ministry of Health. *Health Sector Transformation Plan: 2015/16–2019/20*. Addis Ababa 2015.
92. Wang Q, Brenner S, Leppert G, Banda TH, Kalmus O, De Allegri M. Health seeking behaviour and the related household out-of-pocket expenditure for chronic non-communicable diseases in rural Malawi. *Health policy and planning*. 2015; 30(2):242–52. <https://doi.org/10.1093/heapol/czu004> PMID: [24561879](#)
93. Wickramasinghe DP, Samarasekera DN. Incidence of esophageal cancer in Sri Lanka: Analysis of cancer registry data and comparison with other South Asian populations. *Asia-Pacific journal of clinical oncology*. 2016.
94. Abbas SM, Alam AY, Majid A. To determine the probable causes of death in an urban slum community of Pakistan among adults 18 years and above by verbal autopsy. *JPMA The Journal of the Pakistan Medical Association*. 2011; 61(3):235–8. PMID: [21465935](#)
95. Armas NB, Ortega YY, de la Noval R, Suarez R, Llerena L, Duenas AF. Acute myocardial infarction mortality in Cuba, 1999–2008. *MEDICC review*. 2012; 14(4):19–25. PMID: [23154314](#)

96. Kontis V, Mathers CD, Bonita R, Stevens GA, Rehm J, Shield KD, et al. Regional contributions of six preventable risk factors to achieving the 25 x 25 non-communicable disease mortality reduction target: a modelling study. *The Lancet Global health*. 2015; 3(12):e746–57. [https://doi.org/10.1016/S2214-109X\(15\)00179-5](https://doi.org/10.1016/S2214-109X(15)00179-5) PMID: 26497599
97. Fernando L, Pamela S, Alejandra L. Cardiovascular disease in Latin America: the growing epidemic. *Progress in cardiovascular diseases*. 2014; 57(3):262–7. <https://doi.org/10.1016/j.pcad.2014.07.007> PMID: 25443823
98. Schmidlin K, Spoerri A, Egger M, Zwahlen M, Stuck A, Clough-Gorr KM, et al. Cancer, a disease of aging (part 1)—trends in older adult cancer mortality in Switzerland 1991–2008. *Swiss medical weekly*. 2012; 142:w13637. <https://doi.org/10.4414/smw.2012.13637> PMID: 22893506
99. Hoang VM, Dao LH, Wall S, Nguyen TK, Byass P. Cardiovascular disease mortality and its association with socioeconomic status: findings from a population-based cohort study in rural Vietnam, 1999–2003. *Preventing chronic disease*. 2006; 3(3):A89. PMID: 16776890
100. Beauchamp A, Peeters A, Wolfe R, Turrell G, Harriss LR, Giles GG, et al. Inequalities in cardiovascular disease mortality: the role of behavioural, physiological and social risk factors. *Journal of epidemiology and community health*. 2010; 64(6):542–8. <https://doi.org/10.1136/jech.2009.094516> PMID: 19825786
101. Wagenaar KP, de Boer MR, Luce D, Menvielle G. Time trends in educational differences in lung and upper aero digestive tract cancer mortality in France between 1990 and 2007. *Cancer epidemiology*. 2012; 36(4):329–34. <https://doi.org/10.1016/j.canep.2012.03.003> PMID: 22503315
102. Anteneh A, Araya T, Misganaw A. Factors associated with place of death in Addis Ababa, Ethiopia. *BMC palliative care*. 2013; 12:14. <https://doi.org/10.1186/1472-684X-12-14> PMID: 23530478
103. Perry B, Dalton JE, Edwards M. Family caregivers' compassion fatigue in long-term facilities. *Nurs Older People* 2011; 22(4):26–31.
104. Alter DA, Chong A, Austin PC, Mustard C, Iron K, Williams JI, et al. Socioeconomic status and mortality after acute myocardial infarction. *Annals of internal medicine*. 2006; 144(2):82–93. PMID: 16418407
105. Rawshani A, Svensson AM, Zethelius B, Eliasson B, Rosengren A, Gudbjornsdottir S. Association Between Socioeconomic Status and Mortality, Cardiovascular Disease, and Cancer in Patients With Type 2 Diabetes. *JAMA internal medicine*. 2016; 176(8):1146–54. <https://doi.org/10.1001/jamainternmed.2016.2940> PMID: 27367969
106. Lloyd CB. Household structure and poverty: what are the connections? In: Population Council, editor. New York 1995. p. 74.
107. Cox JA, Lukande RL, Lucas S, Nelson AM, Van Marck E, Colebunders R. Autopsy causes of death in HIV-positive individuals in sub-Saharan Africa and correlation with clinical diagnoses. *AIDS Rev* 2010; 12(4):183–94. PMID: 21179183
